# Supplementary material for: Artificially sweetened beverages consumption and risk of obesity-related cancers: a wide-angled Mendelian randomization study
Source: Front Nutr. 2024 Mar 6;11:1347724. doi: 10.3389/fnut.2024.1347724 (PMC10959093; doi:10.3389/fnut.2024.1347724)
Supplement: Supplementary file 1 [file Data_Sheet_1.xlsx]

## Sheet: Table S1
Table S1 Confounding factors detection with PhenoScanner database
SNP	Trait	PMID	Year	Beta	SE	P	Direction	N
rs11039348	Body mass index females	28892062	2017	0.03332	0.005862	1.314e-08	+	82438
rs11039348	Body mass index	28892062	2017	0.02295	0.003956	6.567e-09	+	173430
rs11039348	Granulocyte count	27863252	2016	0.0202	0.003774	8.585e-08	+	173480
rs11039348	Granulocyte percentage of myeloid white cells	27863252	2016	0.02215	0.003755	3.65e-09	+	173480
rs11039348	Hematocrit	27863252	2016	0.01689	0.003711	5.334e-06	+	173480
rs11039348	Immature fraction of reticulocytes	27863252	2016	-0.0175	0.003733	2.744e-06	-	173480
rs11039348	Mean corpuscular volume	27863252	2016	0.01855	0.00371	5.718e-07	+	173480
rs11039348	Monocyte percentage of white cells	27863252	2016	-0.02342	0.003745	3.992e-10	-	173480
rs11039348	Myeloid white cell count	27863252	2016	0.01845	0.003783	1.077e-06	+	173480
rs11039348	Neutrophil count	27863252	2016	0.02058	0.003764	4.564e-08	+	173480
rs11039348	Platelet count	27863252	2016	-0.02218	0.003832	7.092e-09	-	173480
rs11039348	Plateletcrit	27863252	2016	-0.01959	0.003846	3.524e-07	-	173480
rs11039348	Sum basophil neutrophil counts	27863252	2016	0.02072	0.003771	3.92e-08	+	173480
rs11039348	Sum neutrophil eosinophil counts	27863252	2016	0.02024	0.003767	7.725e-08	+	173480
rs11039348	White blood cell count	27863252	2016	0.0215	0.003767	1.158e-08	+	173480
rs11039348	Age at menarche	UKB	2017	-0.01504	0.002604	7.631e-09	-	176008
rs11039348	Alcohol intake frequency	UKB	2017	0.02334	0.003734	4.09e-10	+	336965
rs11039348	Arm fat mass left	UKB	2017	0.02098	0.002501	4.916e-17	+	331164
rs11039348	Arm fat mass right	UKB	2017	0.02086	0.002501	7.394e-17	+	331226
rs11039348	Arm fat percentage left	UKB	2017	0.02293	0.001932	1.656e-32	+	331198
rs11039348	Arm fat percentage right	UKB	2017	0.02212	0.001941	4.272e-30	+	331249
rs11039348	Birth weight	UKB	2017	-0.01552	0.003329	3.107e-06	-	193063
rs11039348	Body fat percentage	UKB	2017	0.02027	0.001957	3.882e-25	+	331117
rs11039348	Body mass index	UKB	2017	0.0236	0.002525	9.059e-21	+	336107
rs11039348	Comparative body size at age 10	UKB	2017	0.01222	0.001747	2.617e-12	+	331693
rs11039348	Comparative height size at age 10	UKB	2017	-0.01065	0.001743	9.979e-10	-	332021
rs11039348	Current tobacco smoking	UKB	2017	-0.006313	0.001389	5.46e-06	-	337030
rs11039348	Fluid intelligence score	UKB	2017	-0.04988	0.009476	1.419e-07	-	108818
rs11039348	Forced expiratory volume in 1-second	UKB	2017	-0.01125	0.002186	2.655e-07	-	307638
rs11039348	Forced expiratory volume in 1-second, best measure	UKB	2017	-0.01321	0.002403	3.86e-08	-	255492
rs11039348	Forced expiratory volume in 1-second, predicted	UKB	2017	-0.01307	0.002864	5.031e-06	-	110423
rs11039348	Forced vital capacity	UKB	2017	-0.01348	0.002073	7.878e-11	-	307638
rs11039348	Forced vital capacity, best measure	UKB	2017	-0.01625	0.002275	9.1e-13	-	255492
rs11039348	Hand grip strength left	UKB	2017	-0.012	0.00184	7.152e-11	-	335821
rs11039348	Hand grip strength right	UKB	2017	-0.009973	0.001844	6.346e-08	-	335842
rs11039348	Height	UKB	2017	-0.02286	0.001813	2.012e-36	-	336474
rs11039348	Hip circumference	UKB	2017	0.01507	0.002527	2.511e-09	+	336601
rs11039348	Leg fat mass left	UKB	2017	0.01517	0.002017	5.541e-14	+	331275
rs11039348	Leg fat mass right	UKB	2017	0.01494	0.00204	2.436e-13	+	331293
rs11039348	Leg fat percentage left	UKB	2017	0.01498	0.001596	6.263e-21	+	331278
rs11039348	Leg fat percentage right	UKB	2017	0.01458	0.001616	1.904e-19	+	331296
rs11039348	Loneliness, isolation	UKB	2017	-0.006212	0.0009811	2.43e-10	-	332263
rs11039348	Miserableness	UKB	2017	-0.00718	0.001265	1.377e-08	-	331856
rs11039348	Mood swings	UKB	2017	-0.006034	0.001288	2.798e-06	-	329428
rs11039348	Neuroticism score	UKB	2017	-0.05683	0.009138	5.016e-10	-	274108
rs11039348	Sitting height	UKB	2017	-0.02143	0.001973	1.752e-27	-	336172
rs11039348	Smoking status: current	UKB	2017	-0.003543	0.0007711	4.346e-06	-	336024
rs11039348	Suffer from nerves	UKB	2017	-0.008486	0.001068	1.93e-15	-	325248
rs11039348	Trunk fat mass	UKB	2017	0.0198	0.00257	1.313e-14	+	331093
rs11039348	Trunk fat percentage	UKB	2017	0.02375	0.002346	4.229e-24	+	331113
rs11039348	Trunk fat-free mass	UKB	2017	-0.01011	0.001608	3.157e-10	-	331030
rs11039348	Trunk predicted mass	UKB	2017	-0.009964	0.001602	5.042e-10	-	330995
rs11039348	Usual walking pace	UKB	2017	-0.007817	0.001559	5.365e-07	-	335349
rs11039348	Waist circumference	UKB	2017	0.01466	0.00226	8.947e-11	+	336639
rs11039348	Whole body fat mass	UKB	2017	0.01925	0.00249	1.058e-14	+	330762
rs17700144	Granulocyte count	27863252	2016	-0.01942	0.004396	9.947e-06	-	173480
rs17700144	Myeloid white cell count	27863252	2016	-0.01949	0.004407	9.765e-06	-	173480
rs17700144	Neutrophil count	27863252	2016	-0.02009	0.004385	4.633e-06	-	173480
rs17700144	Sum basophil neutrophil counts	27863252	2016	-0.02022	0.004393	4.15e-06	-	173480
rs17700144	White blood cell count	27863252	2016	-0.01948	0.004389	9.026e-06	-	173480
rs17700144	Coronary artery disease	26343387	2015	0.05689	0.0118	1.43e-06	+	184305
rs17700144	Childhood BMI	26604143	2016	0.0621	0.0099	2.886e-10	+	35658
rs17700144	Childhood obesity	22484627	2012	0.1825	0.0322	1.461e-08	+	13848
rs17700144	Body mass index in physically active females	28448500	2017	0.0544	0.0063	4.94e-18	+	89044
rs17700144	Body mass index in physically active males	28448500	2017	0.0641	0.0074	4.12e-18	+	61399
rs17700144	Body mass index in physically active indivdiuals	28448500	2017	0.0569	0.0051	1.33e-28	+	138018
rs17700144	Body mass index in physically active indivdiuals	28448500	2017	0.0579	0.005	3.71e-31	+	149924
rs17700144	Body mass index in females greater than 50 years of age	26426971	2015	0.045	0.0058	9.7e-15	+	104918
rs17700144	Body mass index in females less than or equal to 50 years of age	26426971	2015	0.068	0.0072	5.8e-21	+	65128
rs17700144	Body mass index in females	23754948	2013	0.057	0.0076	5.67e-14	+	67956
rs17700144	Body mass index in females	25673413	2015	0.0555	0.0049	3.659e-30	+	171725
rs17700144	Body mass index in physically inactive females	28448500	2017	0.0661	0.0119	2.86e-08	+	26739
rs17700144	Body mass index in physically inactive males	28448500	2017	0.064	0.0121	1.11e-07	+	21871
rs17700144	Body mass index in physically inactive indivdiuals	28448500	2017	0.062	0.0094	3.85e-11	+	41941
rs17700144	Body mass index in physically inactive indivdiuals	28448500	2017	0.0608	0.0089	7.84e-12	+	46173
rs17700144	Body mass index in males greater than 50 years of age	26426971	2015	0.045	0.006	1.1e-13	+	91907
rs17700144	Body mass index in males less than or equal to 50 years of age	26426971	2015	0.069	0.0083	6.7e-17	+	49978
rs17700144	Body mass index in males	23754948	2013	0.055	0.0079	3.35e-12	+	58618
rs17700144	Body mass index in males	25673413	2015	0.0544	0.005	1.839e-27	+	152654
rs17700144	Body mass index in female non-smokers	28443625	2017	0.0527	0.006	2.236e-18	+	111717
rs17700144	Body mass index in male non-smokers	28443625	2017	0.0617	0.0066	6.931e-21	+	77574
rs17700144	Body mass index in non-smokers	28443625	2017	0.0545	0.0049	2.773e-29	+	163644
rs17700144	Body mass index in non-smokers	28443625	2017	0.0564	0.0047	9.353e-34	+	189291
rs17700144	Body mass index in female smokers	28443625	2017	0.0584	0.0117	6.23e-07	+	25886
rs17700144	Body mass index in male smokers	28443625	2017	0.0604	0.0123	9.873e-07	+	24148
rs17700144	Body mass index in smokers	28443625	2017	0.0574	0.0088	7.543e-11	+	45498
rs17700144	Body mass index in smokers	28443625	2017	0.0592	0.0086	4.613e-12	+	50034
rs17700144	Body mass index tails	23563607	2013	0.18	0.035	1.5e-07	+	12447
rs17700144	Body mass index ajusted for physical activity in females	28448500	2017	0.056	0.0057	2.02e-22	+	115810
rs17700144	Body mass index adjsuted for physical activity in males	28448500	2017	0.0648	0.0063	6.99e-25	+	84264
rs17700144	Body mass index adjusted for physical activity	28448500	2017	0.0578	0.0046	1.28e-36	+	180145
rs17700144	Body mass index adjusted for physical activity	28448500	2017	0.0595	0.0044	0	+	200074
rs17700144	Body mass index adjusted for smoking in females	28443625	2017	0.0524	0.0054	1.958e-22	+	137397
rs17700144	Body mass index adjusted for smoking in males	28443625	2017	0.0598	0.0058	5.723e-25	+	102001
rs17700144	Body mass index adjusted for smoking	28443625	2017	0.0533	0.0042	1.439e-36	+	209268
rs17700144	Body mass index adjusted for smoking	28443625	2017	0.0552	0.004	1.152e-42	+	239398
rs17700144	Body mass index	20935630	2010	NA	NA	1.24e-21	NA	123863
rs17700144	Body mass index	23754948	2013	0.05604	0.005477	1.431e-24	+	126574
rs17700144	Body mass index	25673413	2015	0.0552	0.0038	2.196e-48	+	321668
rs17700144	Body mass index	25673413	2015	0.0557	0.0037	8.822e-52	+	338737
rs17700144	Height	25282103	2014	0.024	0.0037	3.3e-11	+	250973
rs17700144	Hip circumference in females	25673412	2015	0.049	0.0057	7.7e-18	+	125014
rs17700144	Hip circumference in males	25673412	2015	0.052	0.006	5e-18	+	100309
rs17700144	Hip circumference	25673412	2015	0.05	0.0044	5.5e-30	+	212868
rs17700144	Hip circumference	25673412	2015	0.051	0.0043	6.9e-32	+	227257
rs17700144	Obesity class 1	23563607	2013	0.13	0.015	1.1e-16	+	94997
rs17700144	Obesity class 2	23563607	2013	0.16	0.024	1.1e-11	+	67572
rs17700144	Overweight	23563607	2013	0.098	0.011	1.6e-18	+	154851
rs17700144	Waist circumference in females	23754948	2013	0.057	0.0088	1.36e-10	+	47320
rs17700144	Waist circumference in females	25673412	2015	0.053	0.0053	1e-23	+	134348
rs17700144	Waist circumference in males	23754948	2013	0.052	0.0093	1.74e-08	+	38304
rs17700144	Waist circumference in males	25673412	2015	0.046	0.0058	1.5e-15	+	109921
rs17700144	Waist circumference	23754948	2013	0.05464	0.006392	1.254e-17	+	85624
rs17700144	Waist circumference	25673412	2015	0.048	0.0042	9.9e-31	+	231778
rs17700144	Waist circumference	25673412	2015	0.05	0.0041	2.2e-34	+	244119
rs17700144	Waist hip ratio in females	25673412	2015	0.03	0.0055	4.9e-08	+	124492
rs17700144	Waist hip ratio	23754948	2013	0.0326	0.006495	5.197e-07	+	77312
rs17700144	Waist hip ratio	25673412	2015	0.024	0.0041	3.8e-09	+	212031
rs17700144	Waist hip ratio	25673412	2015	0.025	0.0041	4.5e-10	+	226428
rs17700144	Weight in females	23754948	2013	0.059	0.0076	1e-14	+	67592
rs17700144	Weight in males	23754948	2013	0.062	0.0079	5.58e-15	+	58322
rs17700144	Weight	23754948	2013	0.06044	0.005477	2.573e-28	+	125914
rs17700144	High density lipoprotein	24097068	2013	-0.0248	0.0043	6.386e-08	-	185592
rs17700144	High density lipoprotein	20686565	2010	-0.0374	0.0062	1.615e-08	-	99900
rs17700144	Body mass index	19079261	2008	NA	NA	3.5e-07	NA	32387
rs17700144	Body mass index	19557197	2009	NA	NA	4.4e-07	NA	31373
rs17700144	Body mass index	20935630	2010	NA	NA	1.24e-21	NA	123865
rs17700144	HDL cholesterol	20686565	2010	NA	NA	1.615e-08	NA	100184
rs17700144	Obesity in children and adolescents with early age of onset	20421936	2010	NA	NA	6.48e-11	NA	2258
rs17700144	Obesity with early age of onset age 2	22484627	2012	NA	NA	1.461e-08	NA	13848
rs17700144	Waist circumference	19557161	2009	NA	NA	6.2e-11	NA	38580
rs17700144	Waist circumference	19557197	2009	NA	NA	4.1e-06	NA	31373
rs17700144	Body fat percentage	26833246	2016	0.0312	0.0059	1.195e-07	+	96289
rs17700144	Obesity early onset extreme	20421936	2010	0.1989	0.03039	6e-11	+	-
rs17700144	Alcohol intake frequency	UKB	2017	0.02251	0.004333	2.051e-07	+	336965
rs17700144	Arm fat mass left	UKB	2017	0.04941	0.002902	5.814e-65	+	331164
rs17700144	Arm fat mass right	UKB	2017	0.04922	0.002902	1.63e-64	+	331226
rs17700144	Arm fat percentage left	UKB	2017	0.02613	0.002242	2.191e-31	+	331198
rs17700144	Arm fat percentage right	UKB	2017	0.027	0.002252	4.265e-33	+	331249
rs17700144	Arm fat-free mass left	UKB	2017	0.04141	0.001882	3.359e-107	+	331159
rs17700144	Arm fat-free mass right	UKB	2017	0.03949	0.001845	1.295e-101	+	331221
rs17700144	Arm predicted mass left	UKB	2017	0.04095	0.001875	1.194e-105	+	331146
rs17700144	Arm predicted mass right	UKB	2017	0.03865	0.001838	4.525e-98	+	331216
rs17700144	Basal metabolic rate	UKB	2017	0.04518	0.001963	3.72e-117	+	331307
rs17700144	Body fat percentage	UKB	2017	0.02211	0.002271	2.114e-22	+	331117
rs17700144	Body mass index	UKB	2017	0.05072	0.002929	3.821e-67	+	336107
rs17700144	Comparative body size at age 10	UKB	2017	0.03328	0.002027	1.457e-60	+	331693
rs17700144	Comparative height size at age 10	UKB	2017	0.0118	0.002022	5.365e-09	+	332021
rs17700144	Diabetes diagnosed by doctor	UKB	2017	0.003174	0.0006351	5.793e-07	+	336473
rs17700144	Forced expiratory volume in 1-second, predicted	UKB	2017	0.01739	0.003321	1.645e-07	+	110423
rs17700144	Forced expiratory volume in 1-second, predicted percentage	UKB	2017	-0.02366	0.005187	5.072e-06	-	110423
rs17700144	Hand grip strength left	UKB	2017	0.01015	0.002136	2.023e-06	+	335821
rs17700144	Hand grip strength right	UKB	2017	0.009598	0.00214	7.31e-06	+	335842
rs17700144	Height	UKB	2017	0.02291	0.002105	1.342e-27	+	336474
rs17700144	Hip circumference	UKB	2017	0.0482	0.002933	1.128e-60	+	336601
rs17700144	Impedance of arm left	UKB	2017	-0.03534	0.002091	5.032e-64	-	331292
rs17700144	Impedance of arm right	UKB	2017	-0.03418	0.002083	1.595e-60	-	331279
rs17700144	Impedance of leg left	UKB	2017	-0.05156	0.0027	2.819e-81	-	331296
rs17700144	Impedance of leg right	UKB	2017	-0.04965	0.002679	1.236e-76	-	331301
rs17700144	Impedance of whole body	UKB	2017	-0.04558	0.002258	1.359e-90	-	331284
rs17700144	Leg fat mass left	UKB	2017	0.0369	0.002341	5.827e-56	+	331275
rs17700144	Leg fat mass right	UKB	2017	0.03732	0.002368	5.872e-56	+	331293
rs17700144	Leg fat percentage left	UKB	2017	0.01772	0.001852	1.1e-21	+	331278
rs17700144	Leg fat percentage right	UKB	2017	0.01797	0.001876	9.696e-22	+	331296
rs17700144	Leg fat-free mass left	UKB	2017	0.04339	0.001949	1.119e-109	+	331258
rs17700144	Leg fat-free mass right	UKB	2017	0.04264	0.001949	4.513e-106	+	331285
rs17700144	Leg predicted mass left	UKB	2017	0.04308	0.001936	1.292e-109	+	331253
rs17700144	Leg predicted mass right	UKB	2017	0.04262	0.001936	2.5e-107	+	331285
rs17700144	Nervous feelings	UKB	2017	-0.006271	0.001274	8.626e-07	-	328725
rs17700144	Self-reported hypertension	UKB	2017	0.005882	0.0013	6.036e-06	+	337159
rs17700144	Sitting height	UKB	2017	0.01445	0.00229	2.756e-10	+	336172
rs17700144	Suffer from nerves	UKB	2017	-0.007348	0.00124	3.085e-09	-	325248
rs17700144	Tense or highly strung	UKB	2017	-0.00502	0.001135	9.679e-06	-	327232
rs17700144	Trunk fat mass	UKB	2017	0.04352	0.002982	3.203e-48	+	331093
rs17700144	Trunk fat percentage	UKB	2017	0.02457	0.002723	1.842e-19	+	331113
rs17700144	Trunk fat-free mass	UKB	2017	0.04167	0.001865	1.686e-110	+	331030
rs17700144	Trunk predicted mass	UKB	2017	0.04138	0.001859	1.009e-109	+	330995
rs17700144	Vascular or heart problems diagnosed by doctor: high blood pressure	UKB	2017	0.006358	0.001318	1.4e-06	+	336683
rs17700144	Vascular or heart problems diagnosed by doctor: none of the above	UKB	2017	-0.006913	0.001353	3.251e-07	-	336683
rs17700144	Waist circumference	UKB	2017	0.04205	0.002623	8.137e-58	+	336639
rs17700144	Weight	UKB	2017	0.05545	0.002587	7.306e-102	+	336227
rs17700144	Whole body fat mass	UKB	2017	0.04487	0.002889	2.284e-54	+	330762
rs17700144	Whole body fat-free mass	UKB	2017	0.04308	0.001872	4.184e-117	+	331291
rs17700144	Whole body water mass	UKB	2017	0.0431	0.001875	7.361e-117	+	331315
rs17700144	Worrier or anxious feelings	UKB	2017	-0.008718	0.001471	3.067e-09	-	328717
rs17700144	Coronary artery disease	29212778	2018	0.028	0.0063	8.429e-06	+	547261
rs28796334	Arm fat mass left	UKB	2017	0.02022	0.003066	4.299e-11	+	331164
rs28796334	Arm fat mass right	UKB	2017	0.02095	0.003065	8.154e-12	+	331226
rs28796334	Arm fat percentage left	UKB	2017	0.01241	0.002368	1.603e-07	+	331198
rs28796334	Arm fat percentage right	UKB	2017	0.01228	0.002379	2.451e-07	+	331249
rs28796334	Arm fat-free mass left	UKB	2017	0.01486	0.001989	7.806e-14	+	331159
rs28796334	Arm fat-free mass right	UKB	2017	0.0141	0.001949	4.792e-13	+	331221
rs28796334	Arm predicted mass left	UKB	2017	0.01451	0.001981	2.415e-13	+	331146
rs28796334	Arm predicted mass right	UKB	2017	0.01398	0.001942	6.23e-13	+	331216
rs28796334	Basal metabolic rate	UKB	2017	0.01592	0.002074	1.632e-14	+	331307
rs28796334	Body mass index	UKB	2017	0.02337	0.003095	4.336e-14	+	336107
rs28796334	Comparative body size at age 10	UKB	2017	0.0103	0.002142	1.498e-06	+	331693
rs28796334	Hip circumference	UKB	2017	0.01872	0.003099	1.536e-09	+	336601
rs28796334	Impedance of arm left	UKB	2017	-0.01546	0.002209	2.574e-12	-	331292
rs28796334	Impedance of arm right	UKB	2017	-0.01411	0.0022	1.41e-10	-	331279
rs28796334	Impedance of leg left	UKB	2017	-0.02206	0.002852	1.052e-14	-	331296
rs28796334	Impedance of leg right	UKB	2017	-0.02128	0.002831	5.536e-14	-	331301
rs28796334	Impedance of whole body	UKB	2017	-0.01913	0.002386	1.05e-15	-	331284
rs28796334	Leg fat mass left	UKB	2017	0.01681	0.002473	1.068e-11	+	331275
rs28796334	Leg fat mass right	UKB	2017	0.01688	0.002501	1.488e-11	+	331293
rs28796334	Leg fat percentage left	UKB	2017	0.008908	0.001956	5.282e-06	+	331278
rs28796334	Leg fat percentage right	UKB	2017	0.008994	0.001981	5.649e-06	+	331296
rs28796334	Leg fat-free mass left	UKB	2017	0.01595	0.00206	9.73e-15	+	331258
rs28796334	Leg fat-free mass right	UKB	2017	0.01498	0.002059	3.523e-13	+	331285
rs28796334	Leg predicted mass left	UKB	2017	0.01567	0.002046	1.9e-14	+	331253
rs28796334	Leg predicted mass right	UKB	2017	0.01482	0.002046	4.407e-13	+	331285
rs28796334	Trunk fat mass	UKB	2017	0.017	0.00315	6.8e-08	+	331093
rs28796334	Trunk fat-free mass	UKB	2017	0.01392	0.001971	1.595e-12	+	331030
rs28796334	Trunk predicted mass	UKB	2017	0.01389	0.001964	1.522e-12	+	330995
rs28796334	Waist circumference	UKB	2017	0.01703	0.002771	8.04e-10	+	336639
rs28796334	Weight	UKB	2017	0.01966	0.002734	6.4e-13	+	336227
rs28796334	Whole body fat mass	UKB	2017	0.01826	0.003053	2.197e-09	+	330762
rs28796334	Whole body fat-free mass	UKB	2017	0.01507	0.001978	2.637e-14	+	331291
rs28796334	Whole body water mass	UKB	2017	0.01506	0.001981	2.933e-14	+	331315
rs3009113	Hair or balding pattern: pattern 4	UKB	2017	0.006471	0.001436	6.568e-06	+	154988
rs6742960	Treatment with indivina 1mg or 2.5mg tablet	UKB	2017	-0.0002484	5.296e-05	2.733e-06	-	337159
rs9941892	Body mass index	UKB	2017	-0.01153	0.002507	4.265e-06	-	336107
rs9941892	Diastolic blood pressure	UKB	2017	-0.01136	0.002567	9.602e-06	-	317756
rs9941892	Impedance of arm left	UKB	2017	0.007905	0.00179	9.996e-06	+	331292
rs9941892	Impedance of arm right	UKB	2017	0.008478	0.001782	1.96e-06	+	331279
rs9941892	Leg fat mass left	UKB	2017	-0.008925	0.002003	8.357e-06	-	331275
rs9941892	Leg fat mass right	UKB	2017	-0.009228	0.002026	5.244e-06	-	331293
rs9941892	Leg fat percentage left	UKB	2017	-0.007293	0.001585	4.18e-06	-	331278
rs9941892	Leg fat percentage right	UKB	2017	-0.007293	0.001605	5.508e-06	-	331296
rs9941892	Treatment with cetirizine	UKB	2017	-0.001272	0.0002691	2.29e-06	-	337159
Abbreviations: SNP, Single nucleotide polymorphism; UKB, UK Biobank; SE, Standard error; NA, Not applicable.

## Sheet: Table S2
Table S2 SNPs used as genetic instruments for artificially sweetened beverages consumption
SNP	Effect allele	Other allele	EAF	Beta	SE	P	F-statistic#
rs17154845	G	T	0.907831	0.0113279	0.00237027	1.76316e-06	22.8404
rs581359	T	G	0.55665	-0.006306	0.00137535	4.54556e-06	21.0224
rs7974500	T	C	0.620342	-0.00683605	0.00140699	1.18399e-06	23.6063
rs3009113	T	C	0.380922	0.00662187	0.00140839	2.58367e-06	22.1063
rs117995679	C	T	0.957461	-0.0166196	0.00358641	3.59123e-06	21.4744
rs9941892	C	T	0.63751	0.00689932	0.00142126	1.20971e-06	23.5649
rs168195	T	A	0.487898	-0.00662583	0.00138163	1.62403e-06	22.9984
rs6742960	G	A	0.79694	-0.00801524	0.00169355	2.21799e-06	22.3994
rs111957722	T	C	0.93156	0.0129659	0.00270544	1.64952e-06	22.9683
rs9849540	C	A	0.556102	-0.00634354	0.00137429	3.92048e-06	21.3062
rs145714996	T	C	0.985566	-0.0301374	0.00643442	2.82063e-06	21.9378
rs2252224	T	C	0.857279	-0.00953885	0.00205141	3.32605e-06	21.6216
rs9355988	G	A	0.460124	-0.00636456	0.0013779	3.86131e-06	21.3354
rs28796334	G	T	0.807948	-0.00817817	0.00175807	3.2956e-06	21.6391
rs78090946	T	A	0.97713	-0.0219431	0.00464271	2.28949e-06	22.3384
rs118020490	A	G	0.988105	0.0329302	0.00675318	1.0832e-06	23.7778
Abbreviations: SNP, Single nucleotide polymorphism; EAF, Effect allele frequency; SE, Standard error. # The F-statistic was estimated using the following formula: (beta/se)2.

## Sheet: Table S3
Table S3 Results of univariable Mendelian randomization after adjusting for confounders
Exposure	Outcome	Method	Beta	SE	P	OR	OR_LL	OR_UL
ASB	Endometrial cancer	IVW	-0.04818	0.751516	0.948882	0.952962	0.21846	4.15699
ASB	Endometrial cancer	MR Egger	1.37487	2.06121	0.516424	3.95455	0.0695925	224.715
ASB	Endometrial cancer	Weighted median	-0.970887	0.931438	0.297248	0.378747	0.0610229	2.35074
ASB	Endometrial cancer	Weighted mode	-1.76101	1.717	0.322459	0.17187	0.00593833	4.97437
ASB	Colorectal cancer	IVW	1.9285	0.760008	0.0111656	6.87919	1.55098	30.5119
ASB	Colorectal cancer	MR Egger	0.157158	2.17227	0.943281	1.17018	0.0165647	82.6651
ASB	Colorectal cancer	Weighted median	1.53281	1.07523	0.153993	4.63118	0.562911	38.1016
ASB	Colorectal cancer	Weighted mode	1.58315	1.85449	0.405878	4.87029	0.128524	184.555
ASB	Gastric cancer	IVW	1.34926	2.212	0.541879	3.85458	0.050476	294.354
ASB	Gastric cancer	MR Egger	0.518154	5.81717	0.930381	1.67893	1.88e-05	150214
ASB	Gastric cancer	Weighted median	0.780103	2.54762	0.759446	2.1817	0.0147985	321.64
ASB	Gastric cancer	Weighted mode	0.762548	4.7647	0.875135	2.14373	0.000188527	24376.2
ASB	Thyroid cancer	IVW	0.164033	1.33224	0.902007	1.17825	0.0865399	16.0421
ASB	Thyroid cancer	MR Egger	1.65777	3.36763	0.630739	5.2476	0.00713477	3859.59
ASB	Thyroid cancer	Weighted median	-0.635504	1.69602	0.707881	0.529668	0.0190688	14.7124
ASB	Thyroid cancer	Weighted mode	-1.22338	2.75046	0.663269	0.294233	0.00134108	64.5548
ASB	Ovarian cancer	IVW	0.478783	0.806648	0.552816	1.61411	0.332124	7.8445
ASB	Ovarian cancer	MR Egger	-0.0746461	2.15593	0.972949	0.928072	0.0135648	63.4965
ASB	Ovarian cancer	Weighted median	1.09109	0.87364	0.211699	2.97753	0.537278	16.5011
ASB	Ovarian cancer	Weighted mode	2.2016	1.70807	0.219882	9.03948	0.31784	257.086
ASB	Breast cancer	IVW	49.0354	21.3975	0.0219263	3.881	2.023	9.776
ASB	Breast cancer	MR Egger	-58.3271	62.2401	0.363536	14.335	5.668	7769.88
ASB	Breast cancer	Weighted median	11.0763	4.02936	0.00597957	64621	24.0169	1.73872e+08
ASB	Breast cancer	Weighted mode	3.00012	2.84258	0.306908	20.088	0.0764341	5279.44
ASB	ER+Breast cancer	IVW	-0.0752918	0.348044	0.828732	0.927473	0.468857	1.83469
ASB	ER+Breast cancer	MR Egger	0.0496264	0.903003	0.957077	1.05088	0.17902	6.16885
ASB	ER+Breast cancer	Weighted median	-0.0950345	0.483334	0.844123	0.909342	0.352618	2.34504
ASB	ER+Breast cancer	Weighted mode	-0.255935	0.833277	0.763599	0.774192	0.151199	3.96414
ASB	ER-Breast cancer	IVW	0.613542	0.632107	0.331733	1.84696	0.535054	6.37556
ASB	ER-Breast cancer	MR Egger	2.56926	1.63027	0.141015	13.0561	0.534692	318.805
ASB	ER-Breast cancer	Weighted median	0.538855	0.762301	0.479641	1.71404	0.384714	7.63669
ASB	ER-Breast cancer	Weighted mode	0.203554	1.41011	0.887435	1.22575	0.0772851	19.4406
ASB	Prostate cancer	IVW	-0.248406	0.367028	0.498531	0.780043	0.379925	1.60155
ASB	Prostate cancer	MR Egger	1.31905	0.950952	0.19064	3.73987	0.579949	24.117
ASB	Prostate cancer	Weighted median	-0.30105	0.523475	0.565225	0.740041	0.265256	2.06465
ASB	Prostate cancer	Weighted mode	0.259372	0.93884	0.786685	1.29612	0.20582	8.16208
ASB	Kindney cancer	IVW	1.86218	1.9998	0.351757	6.43778	0.127783	324.338
ASB	Kindney cancer	MR Egger	3.23009	5.25659	0.5495	25.282	0.000847832	753896
ASB	Kindney cancer	Weighted median	3.22391	2.52215	0.201164	25.1263	0.179157	3523.89
ASB	Kindney cancer	Weighted mode	3.9003	4.51366	0.40209	49.4172	0.00710842	343545
ASB	Liver cancer	IVW	2.90032	4.65825	0.533534	18.18	0.00196974	167795
ASB	Liver cancer	MR Egger	11.9091	13.2648	0.386951	148612	7.6e-07	2.90565e+16
ASB	Liver cancer	Weighted median	3.3088	6.06231	0.585204	27.3523	0.000189083	3.9567e+06
ASB	Liver cancer	Weighted mode	-8.35983	11.0862	0.464243	0.000234084	8.56e-14	639880
ASB	Pancreatic cancer	IVW	1.06306	2.34183	0.649868	2.89522	0.0293955	285.157
ASB	Pancreatic cancer	MR Egger	10.0796	5.74506	0.102874	23850.3	0.307043	1852631569
ASB	Pancreatic cancer	Weighted median	0.335907	2.97267	0.910032	1.39921	0.00412571	474.533
ASB	Pancreatic cancer	Weighted mode	-0.553683	5.1731	0.916283	0.574829	2.27e-05	14553.6
ASB	Esophageal cancer	IVW	-1.07035	2.37626	0.652399	0.34289	0.00325416	36.1302
ASB	Esophageal cancer	MR Egger	-2.87235	6.08296	0.644615	0.0565659	3.76e-07	8520.61
ASB	Esophageal cancer	Weighted median	-1.55978	3.32903	0.6394	0.210183	0.000308227	143.326
ASB	Esophageal cancer	Weighted mode	5.72352	5.8397	0.343669	305.979	0.00327221	2.86115e+07
Abbreviations: OR, Odds ratio; LL, 95% CI lower limit; UL, 95% CI upper limit; SE, Standard error; IVW, Inverse variance-weighted; ASB, Artificially sweetened beverages; ER, Estrogen receptor.

## Sheet: Table S4
Table S4 SNPs used as genetic instruments for sugar-sweetened beverages
SNP	Effect allele	Other allele	EAF	Beta	SE	P	F-statistic#
rs76585640	G	C	0.953589	-0.0169348	0.00346753	1.04238e-06	23.8517
rs6416745	G	A	0.0806641	-0.012668	0.00270752	2.88974e-06	21.8914
rs16970214	T	C	0.56782	-0.00718138	0.00146939	1.02398e-06	23.8859
rs72809020	T	C	0.816341	0.00904782	0.00190362	2.00785e-06	22.5906
rs11922581	T	G	0.541245	0.00681925	0.00146852	3.42862e-06	21.5632
rs304216	C	G	0.278588	-0.00738934	0.0016177	4.93551e-06	20.8649
rs13114522	A	C	0.981373	-0.0254049	0.0055192	4.1705e-06	21.1876
rs9688032	T	A	0.706779	-0.00761532	0.0016332	3.12361e-06	21.7419
rs76459067	G	C	0.875241	-0.0107093	0.00221413	1.32173e-06	23.3946
rs77271157	G	A	0.894674	-0.0113018	0.00244852	3.92257e-06	21.3053
rs7870366	A	G	0.897557	-0.0115624	0.00239866	1.43546e-06	23.2359
rs56258462	G	A	0.969366	-0.020987	0.00422608	6.8459e-07	24.6618
Abbreviations: SNP, Single nucleotide polymorphism; EAF, Effect allele frequency; SE, Standard error. # The F-statistic was estimated using the following formula: (beta/se)2.

## Sheet: Table S5
Table S5 Results of multivariable Mendelian randomization
Exposure	Outcome	Method	Beta	SE	P	OR	OR_LL	OR_UL
ASB	Endometrial cancer	IVW	-0.204298	0.836748	0.807109	0.815219	0.158137	4.20257
ASB	Endometrial cancer	MR Egger	0.26315	1.39427	0.850299	1.30102	0.0846211	20.0028
ASB	Endometrial cancer	Lasso	-0.204298	0.836748	0.807109	0.815219	0.158137	4.20257
ASB	Endometrial cancer	Weighted median	-1.01704	1.21739	0.403479	0.361665	0.0332706	3.93144
ASB	Colorectal cancer	IVW	1.91774	0.752517	0.0108207	6.80118	1.55712	29.7447
ASB	Colorectal cancer	MR Egger	-0.355951	1.16917	0.760787	0.700507	0.0708291	6.92809
ASB	Colorectal cancer	Lasso	0.192017	0.771585	0.803469	1.21169	0.267065	5.49752
ASB	Colorectal cancer	Weighted median	0.166004	1.12557	0.88275	1.18058	0.13002	10.7196
ASB	Gastric cancer	IVW	0.90095	1.90325	0.635946	2.46194	0.0590514	102.642
ASB	Gastric cancer	MR Egger	0.0169494	3.02136	0.995524	1.01709	0.00272633	379.441
ASB	Gastric cancer	Lasso	-1.89396	1.7447	0.277677	0.150474	0.00492462	4.59783
ASB	Gastric cancer	Weighted median	0.836994	2.73802	0.759838	2.30942	0.0107868	494.437
ASB	Thyroid cancer	IVW	0.382341	1.34855	0.776778	1.46571	0.10427	20.6034
ASB	Thyroid cancer	MR Egger	-1.03929	2.10118	0.620869	0.353707	0.00575591	21.7357
ASB	Thyroid cancer	Lasso	0.382341	1.34855	0.776778	1.46571	0.10427	20.6034
ASB	Thyroid cancer	Weighted median	-0.690869	1.91055	0.717645	0.50114	0.0118494	21.1944
ASB	Ovarian cancer	IVW	0.64378	0.767869	0.401807	1.90366	0.422648	8.57435
ASB	Ovarian cancer	MR Egger	0.0588715	1.18023	0.960217	1.06064	0.104943	10.7196
ASB	Ovarian cancer	Lasso	1.23877	0.669376	0.0642217	3.45138	0.929433	12.8164
ASB	Ovarian cancer	Weighted median	2.5775	1.03787	0.0130113	13.1642	1.72171	100.653
ASB	Breast cancer	IVW	52.8826	23.0532	0.0217944	3.66812	2.00111	8.69733
ASB	Breast cancer	MR Egger	-0.583435	0.451864	0.196643	0.557979	0.230139	1.35283
ASB	Breast cancer	Lasso	-0.286815	0.29589	0.33238	0.750651	0.420316	1.3406
ASB	Breast cancer	Weighted median	-0.32127	0.439894	0.465186	0.725227	0.306221	1.71756
ASB	ER+Breast cancer	IVW	-0.105298	0.351608	0.764576	0.900056	0.451835	1.79291
ASB	ER+Breast cancer	MR Egger	-0.634622	0.535547	0.236018	0.530136	0.185579	1.51442
ASB	ER+Breast cancer	Lasso	-0.105298	0.351608	0.764576	0.900056	0.451835	1.79291
ASB	ER+Breast cancer	Weighted median	-0.340652	0.533629	0.523235	0.711307	0.249937	2.02434
ASB	ER-Breast cancer	IVW	0.464663	0.543365	0.392463	1.59148	0.54864	4.61651
ASB	ER-Breast cancer	MR Egger	1.02298	0.831032	0.218331	2.78148	0.545632	14.1792
ASB	ER-Breast cancer	Lasso	0.464663	0.543365	0.392463	1.59148	0.54864	4.61651
ASB	ER-Breast cancer	Weighted median	-0.171384	0.847279	0.839701	0.842498	0.16009	4.43378
ASB	Prostate cancer	IVW	-0.33038	0.372501	0.37512	0.718651	0.346294	1.49139
ASB	Prostate cancer	MR Egger	0.600591	0.564869	0.287674	1.8232	0.602581	5.51634
ASB	Prostate cancer	Lasso	-0.33038	0.372501	0.37512	0.718651	0.346294	1.49139
ASB	Prostate cancer	Weighted median	-0.678655	0.575629	0.238406	0.507299	0.164168	1.56762
ASB	Kindney cancer	IVW	2.11826	1.93257	0.27304	8.31669	0.188342	367.244
ASB	Kindney cancer	MR Egger	-0.648886	3.00678	0.829138	0.522628	0.0014415	189.483
ASB	Kindney cancer	Lasso	2.11826	1.93257	0.27304	8.31669	0.188342	367.244
ASB	Kindney cancer	Weighted median	3.3884	2.79012	0.224584	29.6186	0.124914	7022.94
ASB	Liver cancer	IVW	3.26077	4.70447	0.488233	26.0697	0.00258037	263385
ASB	Liver cancer	MR Egger	0.235488	7.66923	0.975504	1.26553	3.75152e-07	4.26909e+06
ASB	Liver cancer	Lasso	3.26077	4.70447	0.488233	26.0697	0.00258037	263385
ASB	Liver cancer	Weighted median	7.05448	6.85698	0.303573	1158.03	0.00168674	7.95047e+08
ASB	Pancreatic cancer	IVW	1.32627	2.38438	0.578051	3.76698	0.0351889	403.256
ASB	Pancreatic cancer	MR Egger	2.64048	3.68446	0.473588	14.02	0.0102454	19185
ASB	Pancreatic cancer	Lasso	1.32627	2.38438	0.578051	3.76698	0.0351889	403.256
ASB	Pancreatic cancer	Weighted median	-0.217122	3.44421	0.949735	0.804832	0.000941864	687.737
ASB	Esophageal cancer	IVW	-0.947612	2.40465	0.693525	0.387666	0.00348032	43.1813
ASB	Esophageal cancer	MR Egger	0.590824	3.7633	0.875248	1.80547	0.00113048	2883.5
ASB	Esophageal cancer	Lasso	-0.947612	2.40465	0.693525	0.387666	0.00348032	43.1813
ASB	Esophageal cancer	Weighted median	-2.60876	3.62583	0.471837	0.0736257	6.0355e-05	89.8143
SSB	Endometrial cancer	IVW	-0.035716	0.767396	0.962878	0.964914	0.214427	4.34208
SSB	Endometrial cancer	MR Egger	0.0612187	0.816256	0.940215	1.06313	0.214678	5.26485
SSB	Endometrial cancer	Lasso	-0.035716	0.767396	0.962878	0.964914	0.214427	4.34208
SSB	Endometrial cancer	Weighted median	-1.20316	1.06521	0.258687	0.300245	0.0372192	2.42206
SSB	Colorectal cancer	IVW	1.19241	0.73272	0.103657	3.29502	0.783729	13.8532
SSB	Colorectal cancer	MR Egger	1.07722	0.808075	0.182508	2.93651	0.602556	14.3109
SSB	Colorectal cancer	Lasso	0.826025	0.73256	0.259494	2.28422	0.543478	9.6005
SSB	Colorectal cancer	Weighted median	1.13294	1.00034	0.257404	3.10476	0.437053	22.0558
SSB	Gastric cancer	IVW	1.18508	1.90328	0.533513	3.27096	0.0784508	136.381
SSB	Gastric cancer	MR Egger	0.878928	2.09661	0.67506	2.40832	0.0395434	146.674
SSB	Gastric cancer	Lasso	2.08745	1.59525	0.190689	8.06435	0.353746	183.843
SSB	Gastric cancer	Weighted median	0.219402	2.3695	0.926226	1.24533	0.0119774	129.482
SSB	Thyroid cancer	IVW	-0.876113	1.34863	0.515931	0.416399	0.0296177	5.85419
SSB	Thyroid cancer	MR Egger	-1.37199	1.46106	0.347713	0.253602	0.0144708	4.44439
SSB	Thyroid cancer	Lasso	-0.876113	1.34863	0.515931	0.416399	0.0296177	5.85419
SSB	Thyroid cancer	Weighted median	-2.32066	2.14545	0.279399	0.0982083	0.00146535	6.58197
SSB	Ovarian cancer	IVW	-0.338708	0.701065	0.629001	0.712691	0.180365	2.81611
SSB	Ovarian cancer	MR Egger	-0.529378	0.766305	0.489679	0.588971	0.131164	2.64468
SSB	Ovarian cancer	Lasso	-0.277795	0.589114	0.63725	0.757452	0.238726	2.40331
SSB	Ovarian cancer	Weighted median	-0.430571	0.89845	0.63177	0.650138	0.111749	3.7824
SSB	Breast cancer	IVW	0.656787	0.267564	0.0141007	1.92859	1.14153	3.25829
SSB	Breast cancer	MR Egger	0.561019	0.289393	0.0525491	1.75246	0.993839	3.09015
SSB	Breast cancer	Lasso	0.656787	0.267564	0.0141007	1.92859	1.14153	3.25829
SSB	Breast cancer	Weighted median	0.580045	0.371482	0.118421	1.78612	0.862392	3.69927
SSB	ER+Breast cancer	IVW	0.497782	0.318179	0.117707	1.64507	0.881759	3.06915
SSB	ER+Breast cancer	MR Egger	0.328054	0.343534	0.33961	1.38826	0.708035	2.722
SSB	ER+Breast cancer	Lasso	0.497782	0.318179	0.117707	1.64507	0.881759	3.06915
SSB	ER+Breast cancer	Weighted median	0.611597	0.459813	0.183485	1.84337	0.748548	4.53948
SSB	ER-Breast cancer	IVW	1.11712	0.487516	0.021937	3.05605	1.1754	7.94576
SSB	ER-Breast cancer	MR Egger	1.29419	0.526726	0.0140082	3.64805	1.29931	10.2426
SSB	ER-Breast cancer	Lasso	1.11712	0.487516	0.021937	3.05605	1.1754	7.94576
SSB	ER-Breast cancer	Weighted median	1.11516	0.701727	0.112024	3.05005	0.770896	12.0675
SSB	Prostate cancer	IVW	0.406147	0.343611	0.237208	1.50102	0.765429	2.94354
SSB	Prostate cancer	MR Egger	0.723971	0.37294	0.0522276	2.06261	0.993046	4.28414
SSB	Prostate cancer	Lasso	0.406147	0.343611	0.237208	1.50102	0.765429	2.94354
SSB	Prostate cancer	Weighted median	0.631914	0.496192	0.202831	1.88121	0.71134	4.97504
SSB	Kindney cancer	IVW	1.3813	1.89228	0.46541	3.98007	0.09754	162.405
SSB	Kindney cancer	MR Egger	0.621391	1.9813	0.753803	1.86152	0.0383163	90.4378
SSB	Kindney cancer	Lasso	1.3813	1.89228	0.46541	3.98007	0.09754	162.405
SSB	Kindney cancer	Weighted median	0.0784352	2.58051	0.975752	1.08159	0.00687906	170.059
SSB	Liver cancer	IVW	-3.55492	4.60848	0.440478	0.0285837	3.41489e-06	239.255
SSB	Liver cancer	MR Egger	-4.50908	4.98871	0.366072	0.0110086	6.24212e-07	194.148
SSB	Liver cancer	Lasso	-3.55492	4.60848	0.440478	0.0285837	3.41489e-06	239.255
SSB	Liver cancer	Weighted median	-3.80788	7.17309	0.595518	0.0221951	1.73985e-08	28314
SSB	Pancreatic cancer	IVW	-1.71486	2.40152	0.47518	0.179988	0.00162581	19.9259
SSB	Pancreatic cancer	MR Egger	-1.3099	2.55274	0.607858	0.269848	0.00181228	40.1803
SSB	Pancreatic cancer	Lasso	-1.71486	2.40152	0.47518	0.179988	0.00162581	19.9259
SSB	Pancreatic cancer	Weighted median	-1.55909	3.52068	0.657883	0.210327	0.00021188	208.786
SSB	Esophageal cancer	IVW	0.226565	2.39687	0.924692	1.25428	0.0114335	137.599
SSB	Esophageal cancer	MR Egger	0.762615	2.60046	0.769322	2.14387	0.0131124	350.523
SSB	Esophageal cancer	Lasso	0.226565	2.39687	0.924692	1.25428	0.0114335	137.599
SSB	Esophageal cancer	Weighted median	1.50469	3.51133	0.668269	4.50278	0.00461985	4388.66
Abbreviations: OR, Odds ratio; LL, 95% CI lower limit; UL, 95% CI upper limit; SE, Standard error; IVW, Inverse-variance weighted; ASB, Artificially sweetened beverages; SSB, Sugar-sweetened beverage; ER, Estrogen receptor.

## Sheet: Table S6
Table S6 Univariable MR analyses of a causal association between sugar-sweetened beverages and cancer.
Exposure	Outcome	Method	Beta	SE	P	OR	OR_LL	OR_UL
SSB	Endometrial cancer	IVW	-0.103255	0.648148	0.873427	0.901897	0.253187	3.21271
SSB	Endometrial cancer	MR Egger	2.81359	1.91201	0.171902	16.6697	0.393	707.07
SSB	Endometrial cancer	Weighted median	-0.177566	0.87696	0.839543	0.837306	0.150107	4.67055
SSB	Endometrial cancer	Weighted mode	-0.859935	1.37317	0.543933	0.423189	0.0286859	6.24312
SSB	Colorectal cancer	IVW	0.911582	0.731433	0.212656	2.48826	0.593317	10.4353
SSB	Colorectal cancer	MR Egger	-0.415793	2.23253	0.855978	0.659817	0.0082995	52.4559
SSB	Colorectal cancer	Weighted median	1.05728	0.968324	0.274894	2.87852	0.431435	19.2054
SSB	Colorectal cancer	Weighted mode	1.26919	1.33046	0.360603	3.55796	0.262237	48.2735
SSB	Gastric cancer	IVW	1.66947	1.59197	0.294324	5.30937	0.234385	120.27
SSB	Gastric cancer	MR Egger	3.02239	4.84059	0.546355	20.5404	0.00155674	271021
SSB	Gastric cancer	Weighted median	0.480265	2.17685	0.825385	1.6165	0.0226781	115.225
SSB	Gastric cancer	Weighted mode	-0.380567	3.60585	0.917846	0.683474	0.000582582	801.838
SSB	Thyroid cancer	IVW	-1.04956	1.52348	0.490875	0.350093	0.0176754	6.93425
SSB	Thyroid cancer	MR Egger	-7.07106	4.43751	0.142138	0.000849332	1.41838e-07	5.08582
SSB	Thyroid cancer	Weighted median	-3.09959	1.90245	0.103258	0.0450677	0.00108259	1.87614
SSB	Thyroid cancer	Weighted mode	-3.874	2.88336	0.206148	0.0207752	7.29755e-05	5.91443
SSB	Ovarian cancer	IVW	-0.18042	0.65844	0.784077	0.83492	0.229704	3.03473
SSB	Ovarian cancer	MR Egger	-0.632042	2.05088	0.764268	0.531505	0.00954475	29.5972
SSB	Ovarian cancer	Weighted median	0.0218822	0.826994	0.97889	1.02212	0.202093	5.16958
SSB	Ovarian cancer	Weighted mode	0.351484	1.46046	0.81424	1.42117	0.0811862	24.8778
SSB	Breast cancer	IVW	0.635409	0.268598	0.0179985	1.88779	1.11511	3.19588
SSB	Breast cancer	MR Egger	1.02428	0.799835	0.229232	2.7851	0.580774	13.3559
SSB	Breast cancer	Weighted median	0.483474	0.357261	0.175966	1.6217	0.805125	3.26646
SSB	Breast cancer	Weighted mode	0.472045	0.561506	0.418428	1.60327	0.533388	4.81914
SSB	ER+Breast cancer	IVW	0.448375	0.319524	0.16054	1.56577	0.837032	2.92895
SSB	ER+Breast cancer	MR Egger	1.06019	0.949922	0.290489	2.88691	0.448583	18.579
SSB	ER+Breast cancer	Weighted median	0.57904	0.41378	0.161695	1.78433	0.792971	4.01505
SSB	ER+Breast cancer	Weighted mode	0.501322	0.642466	0.451674	1.6509	0.468644	5.81566
SSB	ER-Breast cancer	IVW	1.04483	0.489026	0.0326347	2.84291	1.09017	7.41363
SSB	ER-Breast cancer	MR Egger	2.05625	1.45624	0.188295	7.81662	0.450236	135.706
SSB	ER-Breast cancer	Weighted median	1.0925	0.639123	0.0873822	2.98171	0.851988	10.4351
SSB	ER-Breast cancer	Weighted mode	1.09619	1.04359	0.316064	2.99273	0.387031	23.1414
SSB	Prostate cancer	IVW	0.430571	0.344087	0.210809	1.53814	0.783614	3.01917
SSB	Prostate cancer	MR Egger	-0.119552	1.02131	0.909132	0.887318	0.119873	6.56807
SSB	Prostate cancer	Weighted median	0.502112	0.456895	0.271784	1.65221	0.674757	4.04559
SSB	Prostate cancer	Weighted mode	0.61168	0.751233	0.432784	1.84353	0.422851	8.03732
SSB	Kindney cancer	IVW	2.05662	1.78895	0.2503	7.8195	0.234634	260.596
SSB	Kindney cancer	MR Egger	4.78628	5.15302	0.374853	119.855	0.00492402	2.91736e+06
SSB	Kindney cancer	Weighted median	4.14892	2.34665	0.0770579	63.3657	0.637299	6300.36
SSB	Kindney cancer	Weighted mode	4.28677	3.66451	0.266801	72.731	0.0552617	95722.6
SSB	Liver cancer	IVW	-3.2984	5.46867	0.546412	0.0369421	8.1751e-07	1669.36
SSB	Liver cancer	MR Egger	-8.01259	16.7204	0.642096	0.000331267	1.93867e-18	5.66047e+10
SSB	Liver cancer	Weighted median	-3.49796	6.64821	0.598783	0.0302589	6.63405e-08	13801.6
SSB	Liver cancer	Weighted mode	-0.939127	11.2047	0.934709	0.390969	1.13378e-10	1.34821e+09
SSB	Pancreatic cancer	IVW	-1.11865	2.52171	0.657326	0.32672	0.00233157	45.7828
SSB	Pancreatic cancer	MR Egger	-3.87902	7.92544	0.635089	0.0206711	3.70763e-09	115247
SSB	Pancreatic cancer	Weighted median	-0.257045	3.42472	0.94017	0.773333	0.000940124	636.133
SSB	Pancreatic cancer	Weighted mode	-0.276228	4.81119	0.955245	0.75864	6.09074e-05	9449.35
SSB	Esophageal cancer	IVW	-0.857527	2.42035	0.723115	0.42421	0.0036926	48.7336
SSB	Esophageal cancer	MR Egger	1.07412	7.41579	0.887713	2.92743	1.42573e-06	6.01082e+06
SSB	Esophageal cancer	Weighted median	0.11763	3.34721	0.971966	1.12483	0.00159177	794.861
SSB	Esophageal cancer	Weighted mode	0.914357	5.11761	0.861446	2.49517	0.000109875	56663.3
Abbreviations: OR, Odds ratio; LL, 95% CI lower limit; UL, 95% CI upper limit; SE, Standard error; IVW, Inverse-variance weighted; SSB, Sugar-sweetened beverage; ER, Estrogen receptor.

## Sheet: Table S7
Table S7 Univariable MR analyses of a causal association between artificially sweetened beverages and BMI.
Exposure	Outcome	Method	Beta	SE	P	OR	OR_LL	OR_UL
ASB	BMI	IVW	0.332931	0.108784	0.00220991	1.39505	1.12717	1.72659
ASB	BMI	MR Egger	0.0421233	0.252047	0.870603	1.04302	0.636424	1.70939
ASB	BMI	Weighted median	0.413236	0.123339	0.000806965	1.5117	1.18707	1.92511
ASB	BMI	Weighted mode	0.538921	0.229609	0.038683	1.71416	1.09296	2.68842
Abbreviations: OR, Odds ratio; LL, 95% CI lower limit; UL, 95% CI upper limit; SE, Standard error; IVW, Inverse-variance weighted; ASB, Artificially sweetened beverages; BMI, Body Mass Index.

## Sheet: Table S8
Table S8 Univariable MR analyses of a causal association between BMI and cancer.
Exposure	Outcome	Method	Beta	SE	P	OR	OR_LL	OR_UL
BMI	Endometrial cancer	IVW	0.566649	0.0583743	2.81e-22	1.76235	1.57182	1.97598
BMI	Endometrial cancer	MR Egger	0.821371	0.183959	1.01e-05	2.27361	1.58536	3.26066
BMI	Endometrial cancer	Weighted median	0.61223	0.0842857	3.77e-13	1.84454	1.56366	2.17587
BMI	Endometrial cancer	Weighted mode	0.861927	0.256328	0.000835893	2.36772	1.43265	3.9131
BMI	Colorectal cancer	IVW	0.0856888	0.0673759	0.203443	1.08947	0.954691	1.24327
BMI	Colorectal cancer	MR Egger	-0.156351	0.211893	0.460971	0.855259	0.564587	1.29558
BMI	Colorectal cancer	Weighted median	0.145548	0.0985689	0.139781	1.15667	0.95347	1.40318
BMI	Colorectal cancer	Weighted mode	0.0932112	0.246316	0.705295	1.09769	0.677349	1.77889
BMI	Lung cancer	IVW	0.16606	0.0505895	0.00102893	1.18064	1.06919	1.30371
BMI	Lung cancer	MR Egger	-0.0908676	0.163765	0.579268	0.913139	0.662426	1.25874
BMI	Lung cancer	Weighted median	0.0729317	0.0692138	0.292013	1.07566	0.939199	1.23194
BMI	Lung cancer	Weighted mode	-0.185662	0.238436	0.436596	0.830554	0.520483	1.32535
BMI	NSCLC	IVW	0.210291	0.0778071	0.00687738	1.23404	1.05949	1.43734
BMI	NSCLC	MR Egger	0.323946	0.2456	0.187836	1.38257	0.854337	2.23742
BMI	NSCLC	Weighted median	0.291678	0.114327	0.0107332	1.33867	1.06993	1.67491
BMI	NSCLC	Weighted mode	0.483359	0.362784	0.18341	1.62151	0.796365	3.30163
BMI	SCLC	IVW	0.429448	0.192834	0.0259452	1.53641	1.05284	2.24208
BMI	SCLC	MR Egger	0.104818	0.607918	0.863184	1.11051	0.337327	3.65588
BMI	SCLC	Weighted median	0.211278	0.285368	0.459074	1.23526	0.706069	2.16106
BMI	SCLC	Weighted mode	-0.240188	0.740297	0.745748	0.78648	0.184304	3.35615
BMI	Stomach cancer	IVW	0.115073	0.145263	0.428262	1.12195	0.843967	1.49151
BMI	Stomach cancer	MR Egger	1.05384	0.455806	0.021223	2.86863	1.17404	7.00915
BMI	Stomach cancer	Weighted median	0.450338	0.214471	0.0357496	1.56884	1.03043	2.38859
BMI	Stomach cancer	Weighted mode	0.960216	0.577887	0.0972825	2.61226	0.841606	8.10819
BMI	Thyroid cancer	IVW	-0.153228	0.128935	0.234671	0.857934	0.666349	1.1046
BMI	Thyroid cancer	MR Egger	-0.0715055	0.4068	0.860549	0.930991	0.41944	2.06643
BMI	Thyroid cancer	Weighted median	-0.14747	0.182496	0.41905	0.862889	0.603408	1.23395
BMI	Thyroid cancer	Weighted mode	-0.389813	0.53756	0.468732	0.677183	0.236116	1.94217
BMI	Ovarian cancer	IVW	0.104662	0.0511128	0.0405928	1.11034	1.00449	1.22733
BMI	Ovarian cancer	MR Egger	0.264441	0.163213	0.105899	1.3027	0.946053	1.7938
BMI	Ovarian cancer	Weighted median	0.0985354	0.0738869	0.182336	1.10355	0.954772	1.27552
BMI	Ovarian cancer	Weighted mode	0.112916	0.19862	0.569982	1.11954	0.758525	1.65237
BMI	Breast cancer	IVW	-0.0924564	0.0302525	0.00224197	0.911689	0.859202	0.967382
BMI	Breast cancer	MR Egger	-0.191417	0.0990222	0.0538766	0.825789	0.68011	1.00267
BMI	Breast cancer	Weighted median	-0.0952946	0.0378201	0.0117462	0.909105	0.844153	0.979055
BMI	Breast cancer	Weighted mode	-0.0208887	0.127511	0.86995	0.979328	0.762762	1.25738
BMI	ER+Breast cancer	IVW	-0.120795	0.0342863	0.000426501	0.886216	0.828618	0.947817
BMI	ER+Breast cancer	MR Egger	-0.171192	0.112433	0.128578	0.842659	0.676001	1.05041
BMI	ER+Breast cancer	Weighted median	-0.157258	0.0447286	0.000438375	0.854483	0.782762	0.932776
BMI	ER+Breast cancer	Weighted mode	-0.328731	0.145092	0.0239589	0.719836	0.541662	0.956619
BMI	ER-Breast cancer	IVW	-0.0702374	0.0476394	0.140386	0.932172	0.849073	1.02341
BMI	ER-Breast cancer	MR Egger	-0.198599	0.154785	0.200148	0.819879	0.605333	1.11047
BMI	ER-Breast cancer	Weighted median	-0.103047	0.0655747	0.11608	0.902085	0.793284	1.02581
BMI	ER-Breast cancer	Weighted mode	-0.0757767	0.210502	0.719035	0.927023	0.613631	1.40047
BMI	Prostate cancer	IVW	-0.0898785	0.0390815	0.0214613	0.914042	0.846641	0.986809
BMI	Prostate cancer	MR Egger	-0.0386674	0.122419	0.75226	0.962071	0.756835	1.22296
BMI	Prostate cancer	Weighted median	-0.0527114	0.0482196	0.274326	0.948654	0.863103	1.04268
BMI	Prostate cancer	Weighted mode	0.162108	0.152652	0.288849	1.17599	0.871892	1.58614
BMI	Kindney cancer	IVW	0.175887	0.14122	0.212954	1.1923	0.90402	1.57252
BMI	Kindney cancer	MR Egger	-0.421934	0.433488	0.330893	0.655777	0.280391	1.53373
BMI	Kindney cancer	Weighted median	0.0583462	0.219444	0.79033	1.06008	0.689516	1.6298
BMI	Kindney cancer	Weighted mode	-0.355194	0.602996	0.556118	0.701037	0.215011	2.28571
BMI	Liver cancer	IVW	0.749168	0.394528	0.0575783	2.11524	0.97618	4.58341
BMI	Liver cancer	MR Egger	-2.99648	1.21585	0.014083	0.0499627	0.00460991	0.541502
BMI	Liver cancer	Weighted median	0.819658	0.576911	0.155383	2.26972	0.73265	7.03153
BMI	Liver cancer	Weighted mode	-2.1087	2.03305	0.300179	0.121395	0.00225753	6.52785
BMI	HL	IVW	0.109615	0.181696	0.546316	1.11585	0.781525	1.59319
BMI	HL	MR Egger	-0.497695	0.572373	0.385017	0.60793	0.197989	1.86667
BMI	HL	Weighted median	0.212345	0.285418	0.45689	1.23657	0.706752	2.16358
BMI	HL	Weighted mode	0.727707	0.818773	0.374592	2.07033	0.415992	10.3037
BMI	NHL	IVW	0.174236	0.103317	0.0917167	1.19034	0.972129	1.45752
BMI	NHL	MR Egger	0.259172	0.319837	0.418175	1.29586	0.692318	2.42554
BMI	NHL	Weighted median	0.239274	0.156446	0.126157	1.27033	0.934858	1.72618
BMI	NHL	Weighted mode	0.328868	0.379006	0.386006	1.38939	0.661012	2.9204
BMI	Pancreatic cancer	IVW	0.343682	0.194772	0.077642	1.41013	0.962644	2.06563
BMI	Pancreatic cancer	MR Egger	0.313558	0.604441	0.60418	1.36828	0.418472	4.4739
BMI	Pancreatic cancer	Weighted median	0.45235	0.312076	0.147202	1.572	0.852724	2.898
BMI	Pancreatic cancer	Weighted mode	0.635994	0.778277	0.414247	1.8889	0.410891	8.68343
BMI	Esophageal cancer	IVW	0.647724	0.215841	0.00269161	1.91119	1.25192	2.91763
BMI	Esophageal cancer	MR Egger	-0.264014	0.680775	0.698335	0.767963	0.202233	2.91627
BMI	Esophageal cancer	Weighted median	0.5449	0.333439	0.102221	1.72444	0.897053	3.31494
BMI	Esophageal cancer	Weighted mode	0.424193	0.926408	0.64725	1.52836	0.248685	9.39289
BMI	Melanoma	IVW	-0.195004	0.0645444	0.00251738	0.822831	0.725052	0.933796
BMI	Melanoma	MR Egger	0.0571751	0.200423	0.775565	1.05884	0.714871	1.56832
BMI	Melanoma	Weighted median	-0.178957	0.0949845	0.0595569	0.836142	0.694109	1.00724
BMI	Melanoma	Weighted mode	-0.368594	0.301134	0.221576	0.691706	0.383346	1.24811
Abbreviations: OR, Odds ratio; LL, 95% CI lower limit; UL, 95% CI upper limit; SE, Standard error; IVW, Inverse-variance weighted; BMI, Body Mass Index; NSCLC, Non-small cell lung cancer; SCLC, Small cell lung cancer; ER, Estrogen receptor; HL, Hodgkin-lymphoma; NHL, Non-Hodgkin-lymphoma.

## Sheet: Table S9
Table S9 Results of the mediating effect of BMI between breast cancer and ASB
Parameters	Value
Intermediary effect	0.241569
Direct effect	48.7939
Total effect	49.0354
Proportion of intermediary effects	0.00492641
Interactive Mediation Tests (P)	0.762297
Abbreviations: ASB, Artificially sweetened beverages; BMI, Body Mass Index.

## Sheet: Table S10
Table S10 Cochran's Q test results for univariate Mendelian randomization
Exposure	Outcome	Method	Q	P
ASB	Endometrial cancer	MR Egger	16.8983	0.203995
ASB	Endometrial cancer	IVW	17.6165	0.22481
ASB	Colorectal cancer	MR Egger	22.7478	0.0448047
ASB	Colorectal cancer	IVW	22.9642	0.0608548
ASB	Gastric cancer	MR Egger	28.1754	0.00855354
ASB	Gastric cancer	IVW	28.2277	0.0132693
ASB	Thyroid cancer	MR Egger	5.23548	0.969637
ASB	Thyroid cancer	IVW	5.46873	0.978162
ASB	Ovarian cancer	MR Egger	22.7685	0.0297571
ASB	Ovarian cancer	IVW	22.9157	0.0426994
ASB	Breast cancer	MR Egger	10.2555	0.593559
ASB	Breast cancer	IVW	10.4954	0.653006
ASB	ER+Breast cancer	MR Egger	10.6396	0.560032
ASB	ER+Breast cancer	IVW	10.6621	0.639104
ASB	ER-Breast cancer	MR Egger	15.7513	0.202895
ASB	ER-Breast cancer	IVW	17.9551	0.15923
ASB	Prostate cancer	MR Egger	8.37013	0.755579
ASB	Prostate cancer	IVW	11.5626	0.563795
ASB	Kindney cancer	MR Egger	19.9596	0.0962225
ASB	Kindney cancer	IVW	20.0826	0.127558
ASB	Liver cancer	MR Egger	7.30544	0.836787
ASB	Liver cancer	IVW	7.83157	0.854397
ASB	Pancreatic cancer	MR Egger	6.12031	0.941664
ASB	Pancreatic cancer	IVW	9.07425	0.826265
ASB	Esophageal cancer	MR Egger	12.0277	0.525372
ASB	Esophageal cancer	IVW	12.1313	0.595761
Abbreviations: IVW, Inverse-variance weighted; ASB, Artificially sweetened beverages; ER, Estrogen receptor.

[truncated: 4 more sheets: Table S11, Table S12, Table S13, Table S14]
